# Supplementary material
Source: publisher figshare collection journal article supplement (https://frontiersin.figshare.com/ndownloader/files/24881384)

**Supplemental figure 1.** Flow chart of patient recruitment, selection and study design.

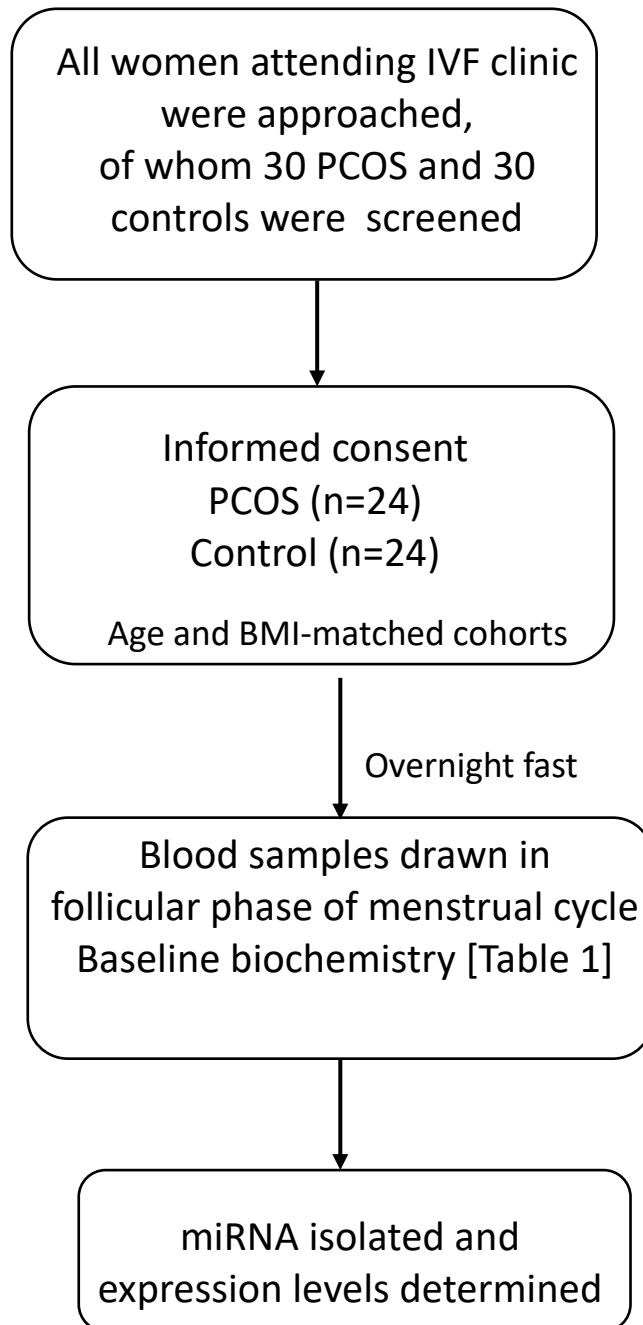

Supplement: Supplementary file [file 24881384]
